# Supplementary material
Source: PubMed Central journal article supplement (PMC6547083)

## Supplementary Online Content

Lee S, Lee YB, Kim BJ, Bae S, Lee W-S. All-cause and cause-specific mortality risks associated with alopecia areata: a Korean nationwide population-based study [published online May 29, 2019]. *JAMA Dermatol*. doi:10.1001/jamadermatol.2019.0629

**eTable 1.** International Statistical Classification of Diseases 10th revision codes for cause of death

**eTable 2.** Cox proportional-hazards models for estimating all-cause and cause-specific mortality risks in patients with alopecia areata and controls

**eTable 3.** All-cause and cause-specific mortality risks in patients with alopecia areata

**eTable 4.** All-cause and cause-specific mortality risks in patients with alopecia totalis/universalis

**eTable 5.** All-cause and cause-specific mortality risks in patients with alopecia areata aged  $\geq 65$  years

**eFigure 1.** Cumulative incidence functions for all-cause and cause-specific mortality in patients with alopecia areata

**eFigure 2.** Age group-stratified cumulative incidence functions for cause-specific deaths from intentional self-harm/psychiatric diseases

**eFigure 3.** Cumulative incidence functions for cause-specific deaths from lung cancer and intentional self-harm/psychiatric diseases in patients with alopecia totalis/universalis

**eFigure 4.** Cumulative incidence functions for diabetes mellitus according to subtype

**eFigure 5.** Comparison of the original analysis and sensitivity analysis

This supplementary material has been provided by the authors to give readers additional information about their work.

**eTable 1. *International Statistical Classification of Diseases 10th revision codes for cause of death***

**Cause-specific deaths according to the organ system**

| <b>Cause</b>                              | <b>Code</b>      |
|-------------------------------------------|------------------|
| Infectious disease                        | A00–B99          |
| Neoplasm/oncological disease              | C00–D48          |
| Endocrine disease                         | E00–E90          |
| Intentional self-harm/psychiatric disease | F00–F99, X60–X84 |
| Neurological disease                      | G00–G99          |
| Cardiovascular disease                    | I00–I99          |
| Respiratory disease                       | J00–J99          |
| Gastrointestinal disease                  | K00–K93          |
| Connective tissue disease                 | L00–M99          |
| Urogenital disease                        | N00–O99          |

**10 leading internal causes of death in patients with alopecia areata**

| <b>Disease</b>           | <b>Code</b>                                      |
|--------------------------|--------------------------------------------------|
| Lung cancer              | C34                                              |
| Hepatocellular carcinoma | C22                                              |
| Gastric cancer           | C16                                              |
| Ischemic heart disease   | I20, I21, I22, I23, I24, I25                     |
| Hemorrhagic stroke       | I60, I61, I62                                    |
| Pancreatic cancer        | C25                                              |
| Colon cancer             | C18                                              |
| Ischemic stroke          | I63                                              |
| Diabetes mellitus        | E10, E11, E12, E13, E14                          |
| Pneumonia                | J09, J10, J11, J12, J13, J14, J15, J16, J17, J18 |

**eTable 2. Cox proportional-hazards models for estimating all-cause and cause-specific mortality risks in patients with alopecia areata and controls**

| Model                                            | Covariates for adjustment |                       |                          |                                |          |        |               |               |            |                |                             |        |
|--------------------------------------------------|---------------------------|-----------------------|--------------------------|--------------------------------|----------|--------|---------------|---------------|------------|----------------|-----------------------------|--------|
|                                                  | Income quartile           | Location of residence | No. of household members | Self-reported personal history |          |        |               |               |            | Smoking status | Alcohol intake <sup>a</sup> | Stress |
|                                                  |                           |                       |                          | Hypertension                   | Diabetes | Stroke | Heart disease | Liver disease | Malignancy |                |                             |        |
| <b>Model 1 <sup>b</sup><br/>(crude)</b>          | -                         | -                     | -                        | -                              | -        | -      | -             | -             | -          | -              | -                           | -      |
| <b>Model 2</b>                                   | ○                         | ○                     | ○                        | -                              | -        | -      | -             | -             | -          | -              | -                           | -      |
| <b>Model 3</b>                                   | -                         | -                     | -                        | ○                              | ○        | ○      | ○             | ○             | ○          | -              | -                           | -      |
| <b>Model 4 <sup>c</sup><br/>(fully-adjusted)</b> | ○                         | ○                     | ○                        | ○                              | ○        | ○      | ○             | ○             | ○          | ○              | ○                           | ○      |

<sup>a</sup> The product of the frequency (per week) and the amount (per drink).

<sup>b</sup> Estimates in model 1 are presented as the crude hazard ratio and 95% confidence interval in the text.

<sup>c</sup> Estimates in model 4 are presented as the adjusted hazard ratio and 95% confidence interval in the text.

**eTable 3. All-cause and cause-specific mortality risks in patients with alopecia areata**

| Cause of death                                                     |                                | No. of deaths  |                      | Model 1 <sup>a</sup> |             | Model 2     |             | Model 3     |             | Model 4 <sup>b</sup> |             |
|--------------------------------------------------------------------|--------------------------------|----------------|----------------------|----------------------|-------------|-------------|-------------|-------------|-------------|----------------------|-------------|
|                                                                    |                                | AA<br>(73,107) | Control<br>(731,070) | HR                   | 95% CI      | HR          | 95% CI      | HR          | 95% CI      | HR                   | 95% CI      |
| <b>All cause</b>                                                   |                                | 1,430          | 14,579               | 0.98                 | 0.93 – 1.03 | 0.99        | 0.94 – 1.05 | 0.98        | 0.93 – 1.03 | 0.98                 | 0.93 – 1.05 |
| <b>Cause-specific death according to systemic or organ disease</b> | Infectious disease             | 34             | 316                  | 1.08                 | 0.76 – 1.54 | 1.05        | 0.73 – 1.52 | 1.07        | 0.75 – 1.52 | 0.97                 | 0.66 – 1.44 |
|                                                                    | Oncological disease            | 579            | 5,978                | 0.97                 | 0.89 – 1.06 | 0.98        | 0.90 – 1.07 | 0.97        | 0.89 – 1.06 | 0.96                 | 0.88 – 1.05 |
|                                                                    | Endocrine disease              | 27             | 509                  | 0.53                 | 0.36 – 0.79 | 0.54        | 0.36 – 0.80 | 0.54        | 0.37 – 0.79 | 0.56                 | 0.38 – 0.84 |
|                                                                    | Psychiatric disease            | 193            | 1,594                | 1.21                 | 1.04 – 1.41 | 1.21        | 1.03 – 1.41 | 1.21        | 1.05 – 1.41 | 1.20                 | 1.02 – 1.40 |
|                                                                    | Neurological disease           | 33             | 280                  | 1.18                 | 0.82 – 1.68 | 1.12        | 0.77 – 1.62 | 1.17        | 0.82 – 1.68 | 1.13                 | 0.77 – 1.66 |
|                                                                    | Cardiovascular disease         | 269            | 2,627                | 1.02                 | 0.90 – 1.16 | 1.05        | 0.93 – 1.20 | 1.02        | 0.90 – 1.15 | 1.07                 | 0.94 – 1.22 |
|                                                                    | Respiratory disease            | 68             | 699                  | 0.97                 | 0.76 – 1.24 | 1.06        | 0.82 – 1.35 | 0.97        | 0.76 – 1.24 | 1.07                 | 0.83 – 1.38 |
|                                                                    | Gastrointestinal disease       | 24             | 208                  | 1.15                 | 0.76 – 1.75 | 1.19        | 0.77 – 1.82 | 1.14        | 0.75 – 1.74 | 1.21                 | 0.70 – 1.89 |
|                                                                    | Rheumatoid disease             | 9              | 78                   | 1.11                 | 0.56 – 2.21 | 1.17        | 0.59 – 2.32 | 1.12        | 0.57 – 2.22 | 1.26                 | 0.64 – 2.52 |
| Urogenital disease                                                 | 12                             | 195            | 0.62                 | 0.35 – 1.11          | 0.65        | 0.37 – 1.17 | 0.62        | 0.35 – 1.11 | 0.64        | 0.35 – 1.18          |             |
| <b>10 leading causes of death in patients with alopecia areata</b> | Lung cancer                    | 112            | 1,156                | 0.97                 | 0.80 – 1.18 | 0.98        | 0.80 – 1.19 | 0.97        | 0.80 – 1.18 | 0.95                 | 0.77 – 1.17 |
|                                                                    | Hepatocellular carcinoma       | 91             | 1,065                | 0.85                 | 0.69 – 1.05 | 0.87        | 0.70 – 1.08 | 0.85        | 0.68 – 1.05 | 0.85                 | 0.67 – 1.06 |
|                                                                    | Ischemic heart disease         | 79             | 713                  | 1.11                 | 0.88 – 1.40 | 1.10        | 0.87 – 1.40 | 1.10        | 0.88 – 1.39 | 1.11                 | 0.87 – 1.42 |
|                                                                    | Gastric cancer                 | 78             | 833                  | 1.00                 | 0.79 – 1.26 | 1.03        | 0.81 – 1.30 | 1.00        | 0.80 – 1.26 | 0.99                 | 0.77 – 1.27 |
|                                                                    | Hemorrhagic stroke             | 53             | 505                  | 1.05                 | 0.79 – 1.39 | 1.11        | 0.83 – 1.47 | 1.06        | 0.80 – 1.40 | 1.07                 | 0.79 – 1.44 |
|                                                                    | Pancreatic cancer              | 53             | 417                  | 1.27                 | 0.96 – 1.69 | 1.32        | 0.99 – 1.75 | 1.28        | 0.96 – 1.70 | 1.24                 | 0.93 – 1.66 |
|                                                                    | Colon cancer                   | 33             | 331                  | 1.00                 | 0.70 – 1.43 | 0.98        | 0.68 – 1.41 | 1.00        | 0.70 – 1.43 | 0.94                 | 0.64 – 1.39 |
|                                                                    | Ischemic stroke                | 29             | 275                  | 1.05                 | 0.72 – 1.53 | 1.14        | 0.77 – 1.67 | 1.04        | 0.71 – 1.52 | 1.15                 | 0.77 – 1.70 |
|                                                                    | Diabetes mellitus <sup>c</sup> | 26             | 461                  | 0.56                 | 0.37 – 0.82 | 0.55        | 0.37 – 0.83 | 0.56        | 0.38 – 0.83 | 0.58                 | 0.38 – 0.87 |
| Pneumonia                                                          | 23                             | 298            | 0.77                 | 0.51 – 1.18          | 0.85        | 0.55 – 1.28 | 0.78        | 0.51 – 1.18 | 0.85        | 0.54 – 1.32          |             |

<sup>a</sup> Estimates in model 1 are presented as the crude HR and 95% CI in the text.

<sup>b</sup> Estimates in model 4 are presented as the adjusted HR and 95% CI in the text.

<sup>c</sup> Type I diabetes (n = 1/487), type II diabetes (n = 335/487, HR 0.64, 95% CI 0.41–1.01), unspecified diabetes (n = 151/487, HR 0.35, 0.14–0.84)

Abbreviations: AA, alopecia areata; HR, hazard ratio; 95% CI, 95% confidence interval.

**eTable 4. All-cause and cause-specific mortality risks in patients with alopecia totalis/universalis**

| Cause of death                                                     |                          | No. of deaths |                   | Model 1 <sup>a</sup> |             | Model 2 |             | Model 3 |             | Model 4 <sup>b</sup> |             |
|--------------------------------------------------------------------|--------------------------|---------------|-------------------|----------------------|-------------|---------|-------------|---------|-------------|----------------------|-------------|
|                                                                    |                          | AT/AU (6,024) | Control (731,070) | HR                   | 95% CI      | HR      | 95% CI      | HR      | 95% CI      | HR                   | 95% CI      |
| <b>All cause</b>                                                   |                          | 130           | 14,579            | 1.03                 | 0.87 – 1.23 | 1.05    | 0.88 – 1.26 | 1.04    | 0.87 – 1.23 | 1.06                 | 0.88 – 1.27 |
| <b>Cause-specific death according to systemic or organ disease</b> | Infectious disease       | 4             | 316               | 1.48                 | 0.55 – 3.95 | 1.17    | 0.38 – 3.65 | 1.47    | 0.55 – 3.94 | 1.27                 | 0.41 – 3.95 |
|                                                                    | Oncological disease      | 59            | 5,978             | 1.15                 | 0.89 – 1.49 | 1.17    | 0.90 – 1.52 | 1.16    | 0.99 – 1.50 | 1.18                 | 0.90 – 1.55 |
|                                                                    | Endocrine disease        | -             | 509               | -                    | -           | -       | -           | -       | -           | -                    | -           |
|                                                                    | Psychiatric disease      | 25            | 1,594             | 1.85                 | 1.25 – 2.75 | 1.90    | 1.27 – 2.84 | 1.86    | 1.25 – 2.76 | 1.93                 | 1.28 – 2.92 |
|                                                                    | Neurological disease     | 3             | 280               | 1.23                 | 0.40 – 3.84 | 1.28    | 0.41 – 3.99 | 1.24    | 0.40 – 3.87 | 1.42                 | 0.45 – 4.42 |
|                                                                    | Cardiovascular disease   | 19            | 2,627             | 0.84                 | 0.54 – 1.32 | 0.90    | 0.57 – 1.41 | 0.85    | 0.54 – 1.34 | 0.89                 | 0.55 – 1.43 |
|                                                                    | Respiratory disease      | 4             | 699               | 0.70                 | 0.26 – 1.87 | 0.76    | 0.28 – 2.02 | 0.70    | 0.26 – 1.88 | 0.84                 | 0.32 – 2.25 |
|                                                                    | Gastrointestinal disease | 2             | 208               | 1.03                 | 0.87 – 1.23 | 1.05    | 0.88 – 1.26 | 1.04    | 0.87 – 1.23 | 1.06                 | 0.88 – 1.27 |
|                                                                    | Rheumatoid disease       | -             | 78                | -                    | -           | -       | -           | -       | -           | -                    | -           |
|                                                                    | Urogenital disease       | 1             | 195               | 0.59                 | 0.08 – 4.21 | 0.62    | 0.09 – 4.41 | 0.60    | 0.08 – 4.29 | 0.71                 | 0.10 – 5.09 |
| <b>10 leading causes of death in patients with alopecia areata</b> | Lung cancer              | 21            | 1,156             | 2.16                 | 1.41 – 3.33 | 2.17    | 1.39 – 3.37 | 2.17    | 1.41 – 3.33 | 2.08                 | 1.30 – 3.31 |
|                                                                    | Hepatocellular carcinoma | 8             | 1,065             | 0.88                 | 0.44 – 1.77 | 0.94    | 0.47 – 1.88 | 0.89    | 0.44 – 1.78 | 1.03                 | 0.51 – 2.06 |
|                                                                    | Ischemic heart disease   | 3             | 713               | 0.50                 | 0.16 – 1.55 | 0.53    | 0.17 – 1.55 | 0.53    | 0.17 – 1.64 | 0.57                 | 0.18 – 1.78 |
|                                                                    | Gastric cancer           | 6             | 833               | 1.40                 | 0.65 – 3.01 | 1.49    | 0.69 – 3.19 | 1.41    | 0.66 – 3.02 | 1.39                 | 0.65 – 2.97 |
|                                                                    | Hemorrhagic stroke       | 6             | 505               | 1.38                 | 0.62 – 3.08 | 1.47    | 0.66 – 3.29 | 1.40    | 0.63 – 3.14 | 1.35                 | 0.60 – 3.48 |
|                                                                    | Pancreatic cancer        | 5             | 417               | 1.38                 | 0.57 – 3.33 | 1.42    | 0.59 – 3.44 | 1.38    | 0.57 – 3.34 | 1.35                 | 0.55 – 3.24 |
|                                                                    | Colon cancer             | 4             | 331               | 1.42                 | 0.53 – 3.80 | 1.47    | 0.55 – 3.94 | 1.42    | 0.53 – 3.80 | 1.37                 | 0.51 – 3.70 |
|                                                                    | Ischemic stroke          | -             | 275               | -                    | -           | -       | -           | -       | -           | -                    | -           |
|                                                                    | Diabetes mellitus        | -             | 461               | -                    | -           | -       | -           | -       | -           | -                    | -           |
|                                                                    | Pneumonia                | 2             | 298               | 0.81                 | 0.20 – 3.27 | 0.88    | 0.22 – 3.51 | 0.82    | 0.21 – 3.30 | 0.99                 | 0.25 – 3.98 |

<sup>a</sup> Estimates in model 1 are presented as the crude hazard ratio and 95% CI in the text.

<sup>b</sup> Estimates in model 4 are presented as the adjusted hazard ratio and 95% CI in the text.

<sup>c</sup> Subgroup analysis was limited due to lack of cause-specific mortality events in patients with alopecia totalis/universalis.

Abbreviations: AT/AU, alopecia totalis/universalis; HR, hazard ratio; 95% CI, 95% confidence interval.

**eTable 5. All-cause and cause-specific mortality risks in patients with alopecia areata aged ≥65 years**

| Cause of death                                                     |                          | No. of deaths |                     | Model 1 |             | Model 2 |             | Model 3 |             | Model 4 |             |
|--------------------------------------------------------------------|--------------------------|---------------|---------------------|---------|-------------|---------|-------------|---------|-------------|---------|-------------|
|                                                                    |                          | AA<br>(1,426) | Control<br>(14,260) | HR      | 95% CI      |
| <b>All cause</b>                                                   |                          | 317           | 3,183               | 0.97    | 0.87 – 1.09 | 0.99    | 0.88 – 1.11 | 0.96    | 0.86 – 1.08 | 0.98    | 0.87 – 1.11 |
| <b>Cause-specific death according to systemic or organ disease</b> | Infectious disease       | 10            | 85                  | 1.11    | 0.58 – 2.12 | 0.93    | 0.45 – 1.91 | 1.09    | 0.57 – 2.09 | 0.89    | 0.41 – 1.92 |
|                                                                    | Oncological disease      | 105           | 1,021               | 1.03    | 0.84 – 1.25 | 1.04    | 0.85 – 1.28 | 1.02    | 0.83 – 1.24 | 1.02    | 0.83 – 1.27 |
|                                                                    | Endocrine disease        | 6             | 154                 | 0.39    | 0.17 – 0.88 | 0.37    | 0.16 – 0.83 | 0.36    | 0.16 – 0.82 | 0.37    | 0.16 – 0.84 |
|                                                                    | Psychiatric disease      | 12            | 147                 | 0.80    | 0.44 – 1.43 | 0.86    | 0.48 – 1.56 | 0.79    | 0.44 – 1.42 | 0.84    | 0.46 – 1.56 |
|                                                                    | Neurological disease     | 15            | 97                  | 1.58    | 0.92 – 2.67 | 1.40    | 0.79 – 2.49 | 1.59    | 0.93 – 2.73 | 1.43    | 0.78 – 2.60 |
|                                                                    | Cardiovascular disease   | 91            | 832                 | 1.06    | 0.85 – 1.31 | 1.09    | 0.88 – 1.36 | 1.05    | 0.85 – 1.31 | 1.10    | 0.87 – 1.38 |
|                                                                    | Respiratory disease      | 31            | 343                 | 0.91    | 0.63 – 1.32 | 1.00    | 0.70 – 1.45 | 0.92    | 0.64 – 1.32 | 1.01    | 0.69 – 1.48 |
|                                                                    | Gastrointestinal disease | 11            | 91                  | 1.22    | 0.59 – 2.53 | 1.23    | 0.59 – 2.56 | 1.19    | 0.57 – 2.47 | 1.27    | 0.58 – 2.77 |
|                                                                    | Rheumatoid disease       | 3             | 26                  | 1.05    | 0.32 – 3.42 | 1.12    | 0.34 – 3.70 | 1.03    | 0.32 – 3.38 | 1.19    | 0.36 – 3.94 |
|                                                                    | Urogenital disease       | 7             | 69                  | 1.00    | 0.46 – 2.17 | 1.01    | 0.47 – 2.20 | 0.98    | 0.45 – 2.13 | 0.97    | 0.42 – 2.23 |
| <b>10 leading causes of death in patients with alopecia areata</b> | Lung cancer              | 27            | 237                 | 0.72    | 0.44 – 1.17 | 0.73    | 0.44 – 1.20 | 0.72    | 0.44 – 1.18 | 0.64    | 0.37 – 1.12 |
|                                                                    | Hepatocellular carcinoma | 10            | 101                 | 0.74    | 0.32 – 1.68 | 0.77    | 0.34 – 1.77 | 0.73    | 0.32 – 1.66 | 0.66    | 0.27 – 1.64 |
|                                                                    | Ischemic heart disease   | 23            | 166                 | 1.32    | 0.86 – 2.03 | 1.27    | 0.81 – 2.00 | 1.31    | 0.85 – 2.02 | 1.26    | 0.79 – 2.00 |
|                                                                    | Gastric cancer           | 11            | 154                 | 0.73    | 0.40 – 1.35 | 0.69    | 0.36 – 1.30 | 0.73    | 0.40 – 1.34 | 0.60    | 0.29 – 1.23 |
|                                                                    | Hemorrhagic stroke       | 11            | 100                 | 1.08    | 0.58 – 2.00 | 1.16    | 0.62 – 2.16 | 1.07    | 0.58 – 1.99 | 1.05    | 0.53 – 2.09 |
|                                                                    | Pancreatic cancer        | 9             | 68                  | 1.31    | 0.66 – 2.61 | 1.34    | 0.67 – 2.68 | 1.31    | 0.66 – 2.60 | 1.47    | 0.73 – 2.94 |
|                                                                    | Colon cancer             | 12            | 72                  | 1.62    | 0.88 – 2.96 | 1.62    | 0.88 – 2.98 | 1.62    | 0.89 – 2.97 | 1.46    | 0.75 – 2.83 |
|                                                                    | Ischemic stroke          | 11            | 145                 | 0.76    | 0.41 – 1.39 | 0.79    | 0.42 – 1.50 | 0.75    | 0.41 – 1.38 | 0.84    | 0.44 – 1.60 |
|                                                                    | Diabetes mellitus        | 6             | 141                 | 0.41    | 0.18 – 0.93 | 0.39    | 0.17 – 0.87 | 0.39    | 0.17 – 0.87 | 0.39    | 0.17 – 0.87 |
|                                                                    | Pneumonia                | 10            | 151                 | 0.68    | 0.36 – 1.28 | 0.73    | 0.39 – 1.39 | 0.68    | 0.36 – 1.29 | 0.65    | 0.32 – 1.32 |

Abbreviations: AA, alopecia areata; HR, hazard ratio; 95% CI, 95% confidence interval.

# eFigure 1. Cumulative incidence functions for all-cause and cause-specific mortality in patients with alopecia areata

Cumulative incidence functions for each cause of death in patients with alopecia areata (red color) and controls (blue color), and NAR in each year of follow-up.

Abbreviations: HR, hazard ratio; NAR, numbers at risk

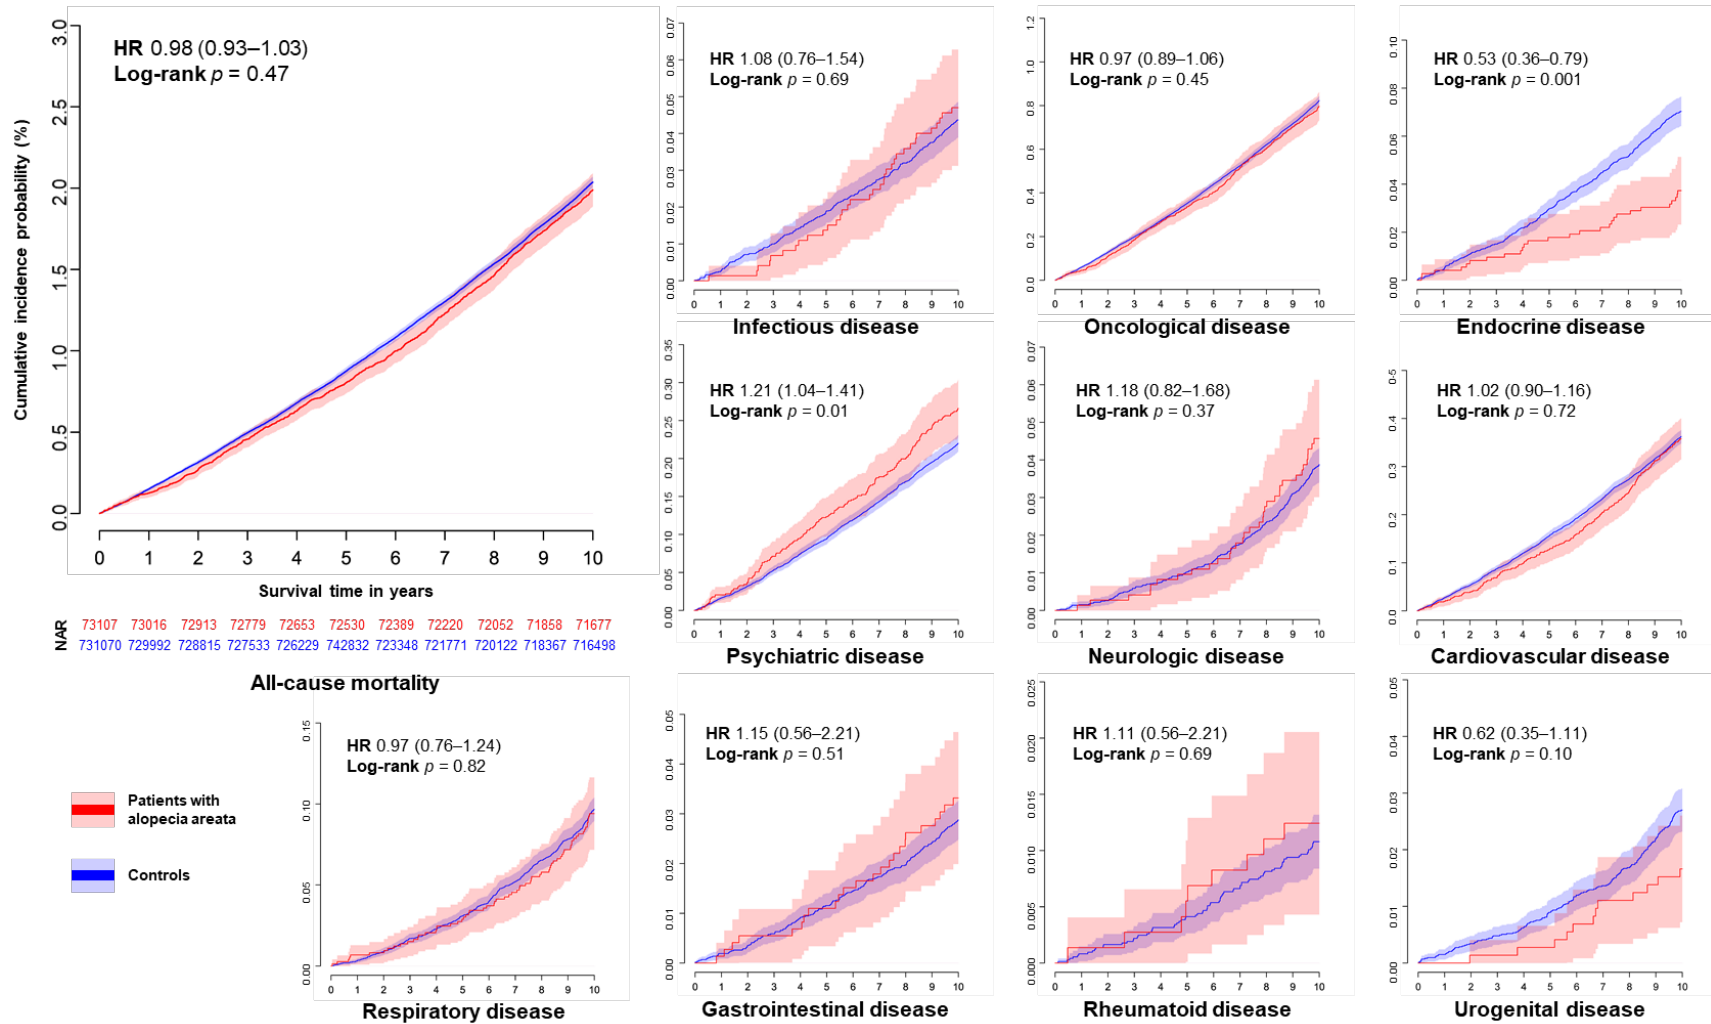

## eFigure 2. Age group-stratified cumulative incidence functions for cause-specific deaths from intentional self-harm/psychiatric disease

In age group-stratified analysis, increased mortality risk from intentional self-harm/psychiatric disease was significantly associated with age <35 years. Patients aged <25 years were markedly affected, while the risk in those aged ≥35 years was not increased. In addition, no differences were found in subsequent analysis of subjects aged 35–44, those aged 45–54, those aged 55–64, and those aged ≥65 years (not shown). NAR in each age group for each year of follow-up is shown.

Abbreviations: HR, hazard ratio; NAR, number at risk

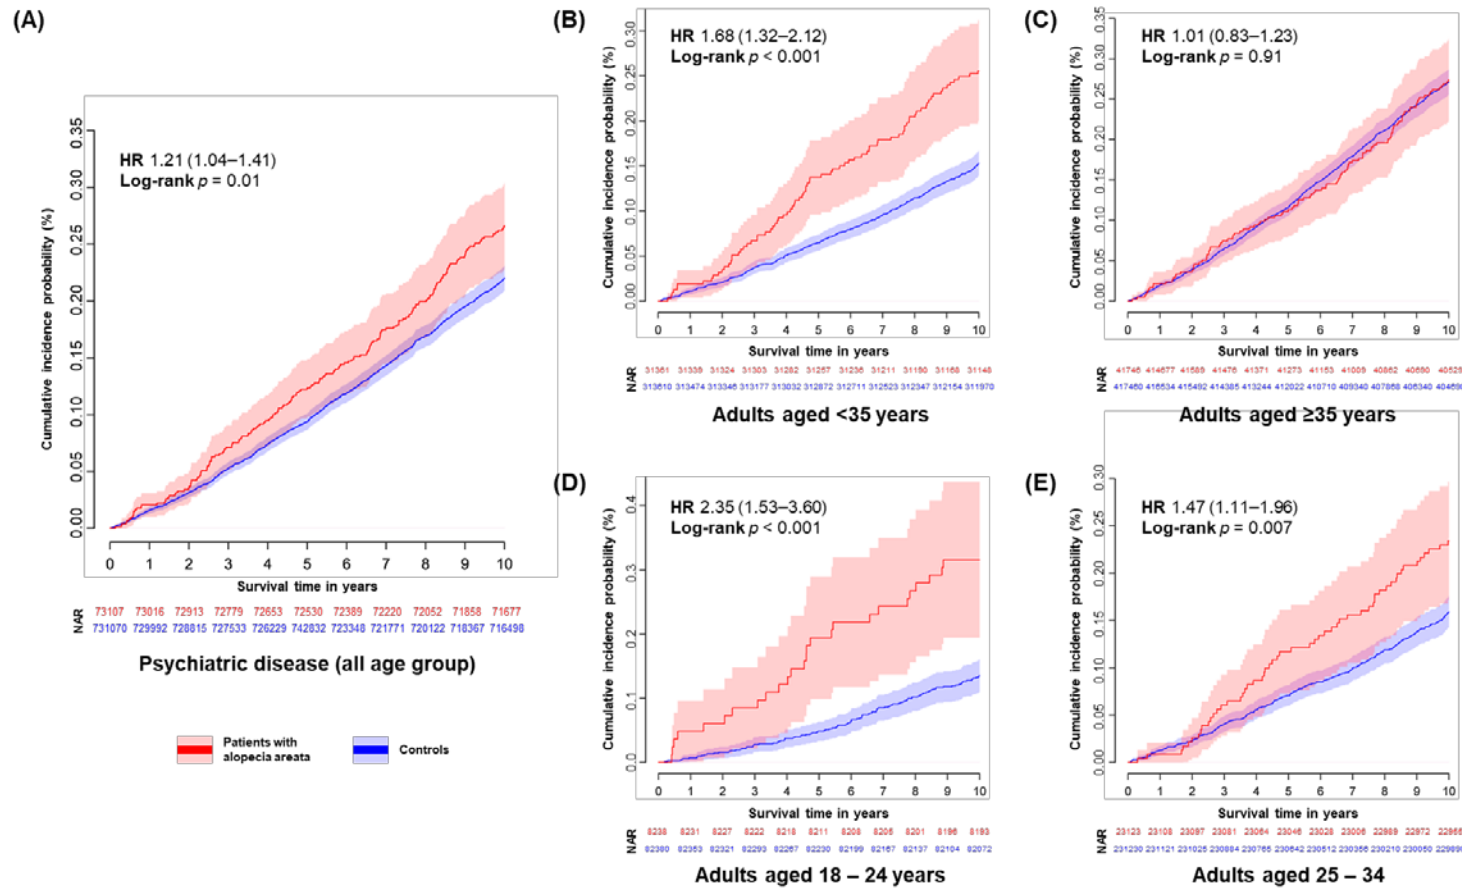



### eFigure 3. Cumulative incidence functions for cause-specific death from lung cancer and intentional self-harm/psychiatric disease in patients with alopecia totalis/universalis

Cumulative incidence function for each cause of death in patients with alopecia totalis/universalis (red color) and controls (blue color), and NAR in each year of follow-up.

Abbreviations: HR, hazard ratio; NAR, number at risk

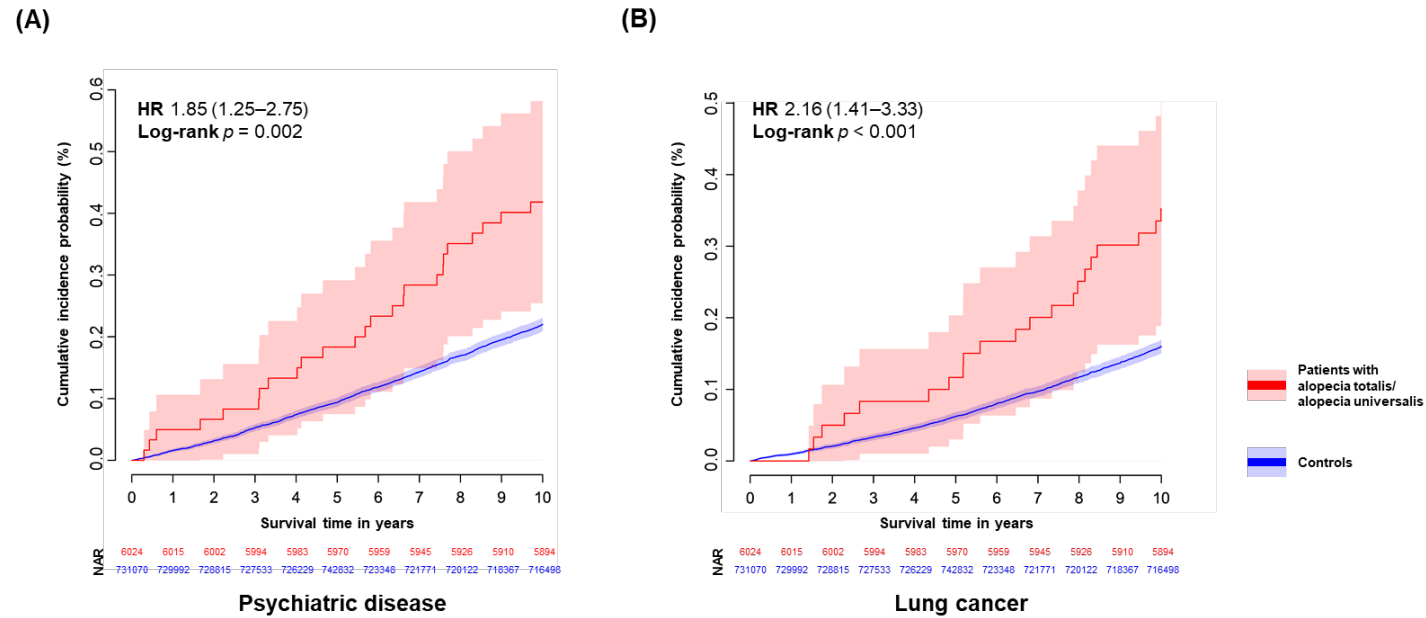

### eFigure 4. Cumulative incidence functions for diabetes mellitus according to subtype

Among 26 deaths from diabetes mellitus in patients with alopecia areata and 461 in controls, only 1 death in controls was documented as type I diabetes. The number of deaths from type II diabetes was 21 in patients and 319 in controls, and the number from unspecified-type diabetes was 5 in patients and 184 in controls..

Abbreviation: HR, hazard ratio; NAR, number at risk

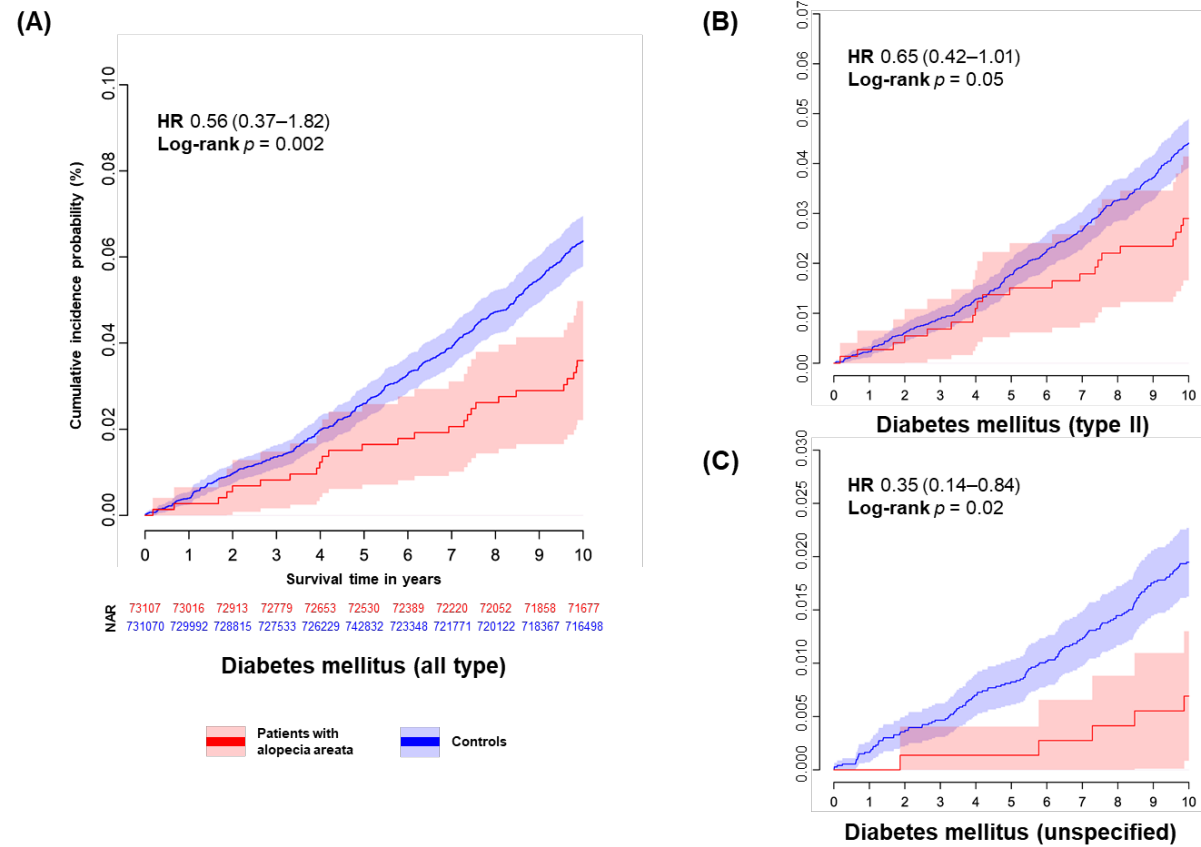

### eFigure 5. Comparison of the original analysis and sensitivity analysis

Sensitivity analysis was performed, in which subjects who died during the first 2 years of follow-up (2007–2008) were excluded from the study population.

Abbreviations: HR, hazard ratio; 95% CI, 95% confidence interval.

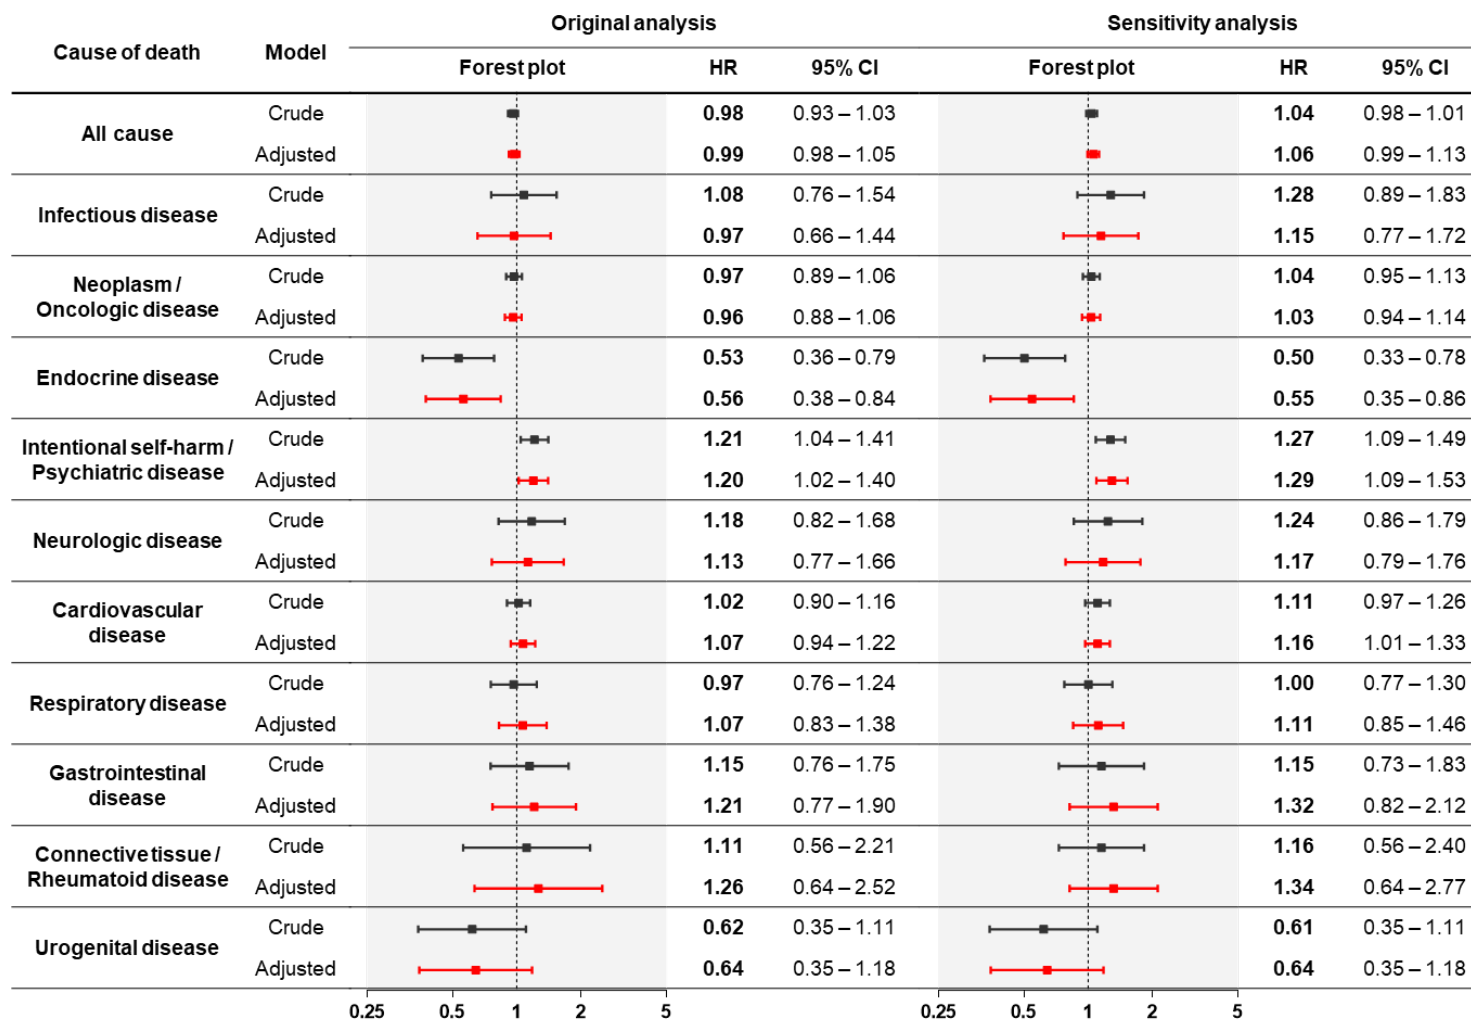

Supplement: jamadermatol-155-922-s001.pdf [file jamadermatol-155-922-s001.pdf]
